# Supplementary material
Source: MDPI journal article supplement (https://www.mdpi.com/2311-7524/8/5/437)
Supplement: s1 [file s1 › horticulturae-1695357-supplementary.pdf]

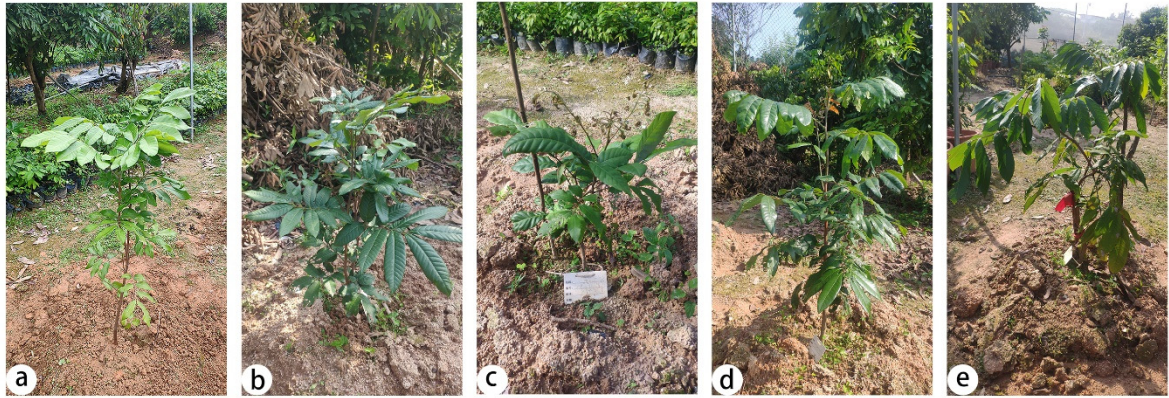

**Supplemental Figure S1.** The growth of triploid and diploid plants: (a) Diploid (control), (b) Triploid 1, (c) Triploid 2, (d) Triploid 3, and (e) Triploid 4.

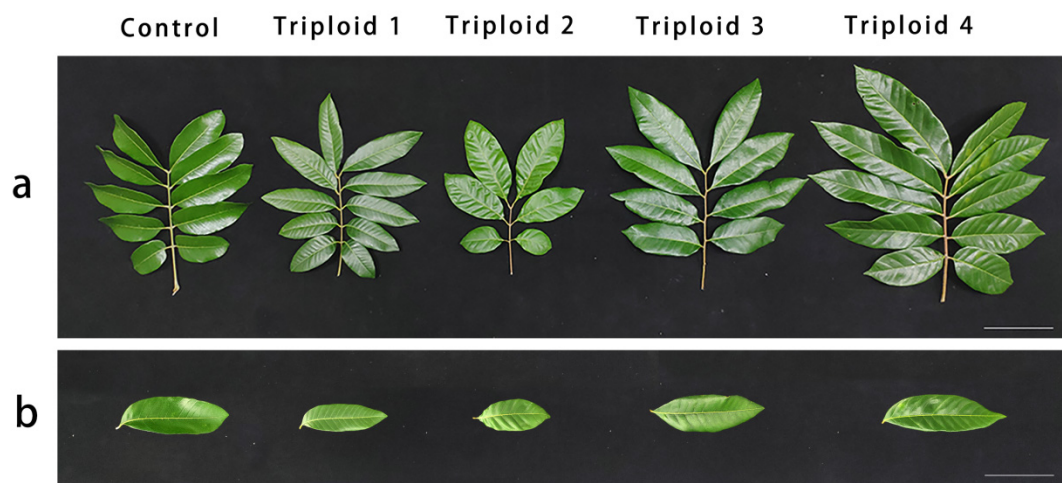

**Supplemental Figure S2.** The leaf morphology of triploid and diploid plants. (a) The compound leaf morphology of triploid and diploid plants. (b) The leaflet morphology of triploid and diploid plants. Scale bar = 10 cm.

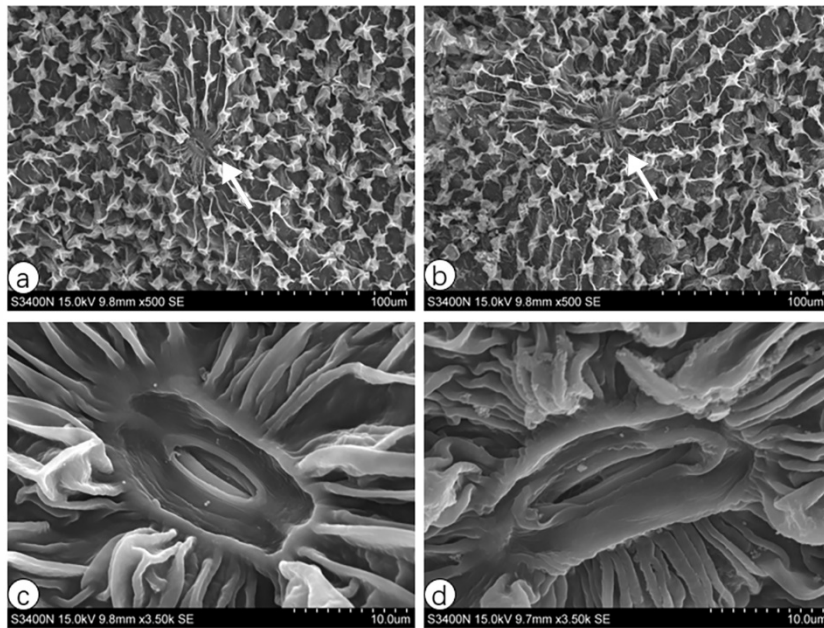

**Supplemental Figure S3.** Observation of stomatal characteristics and distribution of triploid and diploid leaves. (a) Stomatal distribution of diploid leaves. The stomata are indicated by the arrow. Scale bar =100 µm. (b) Stomatal distribution of triploid leaves. Scale bar =100 µm. (c) Stomatal characteristics of diploid leaves. Scale bar =10 µm. (d) Stomatal characteristics of triploid leaves. Scale bar =10 µm.

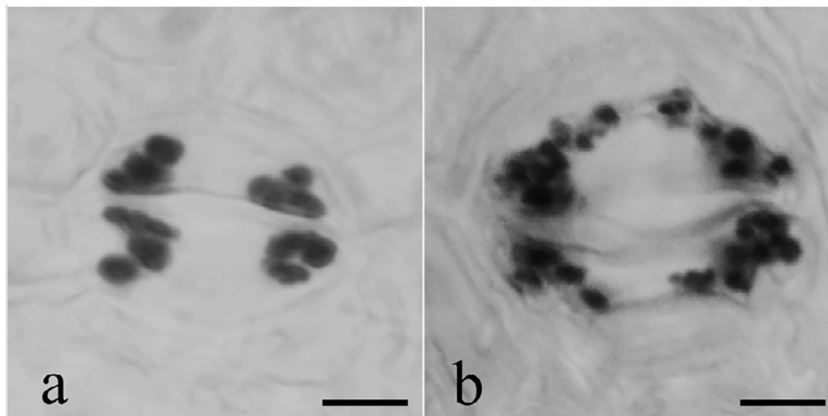

**Supplemental Figure S4.** Observation of chloroplast number in stomatal guard cells of triploid and diploid leaves. (a) Chloroplast number in stomatal guard cells of diploid leaves. (b) Chloroplast number in stomatal guard cells of triploid leaves. Scale bar =10 µm.

**Supplemental Table S1.** The morphological characteristics of male flower buds according to the meiotic process of microspore mother cells.

| Stage     | Diameter (mm) | Flower weight (mg) | Morphological characteristics                                              | Meiotic process of microspore mother cells                    |
|-----------|---------------|--------------------|----------------------------------------------------------------------------|---------------------------------------------------------------|
| Stage I   | 1.4–2.0       | 0.78–2.58          | light green, sepals completely closed, stamens and pistils clearly visible | mainly in pachytene, diplotene, and diakinesis stage          |
| Stage II  | 2.1–3.0       | 2.73–5.50          | brown-green, sepals closed, stamens and pistils equal in height            | at all meiotic stages                                         |
| Stage III | 3.1–3.8       | 6.00–8.66          | yellow-green, sepals slightly open, stamens higher than (atrophic) pistils | mainly in microspore stage, with very few in the tetrad stage |
| Stage IV  | 3.9–4.4       | 9.12–14.37         | light yellow, sepals open to reveal the stamens                            | all in microspore stage                                       |
| Stage V   | over 4.4      | over 15.00         | yellow and blooming, sepals fully spreading                                | meiosis has ended                                             |

**Supplemental Table S2.** The leaf characteristics of triploid and diploid plants.

| Characteristics        | Diploid (Control)  | Triploid 1         | Triploid 2         | Triploid 3         | Triploid 4         |
|------------------------|--------------------|--------------------|--------------------|--------------------|--------------------|
| Plant height (cm)      | 80.70              | 65.50              | 39.80              | 94.50              | 91.00              |
| Rachis length (cm)     | 17.68 ± 5.20<br>a  | 12.9 ± 3.68<br>ab  | 9.08 ± 2.63 b      | 9.08 ± 2.63 b      | 12.00 ± 4.80<br>ab |
| Number of leaflet      | 5                  | 5                  | 3                  | 4                  | 5                  |
| Leaflet blade shape    | oblong             | lanceolate         | oblong             | oblong             | oblong             |
| Leaflet margin         | curved             | curved             | curved             | curved             | curved             |
| Leaflet curvature      | upward from midrib |
| Mature leaf colour     | green              | green              | light green        | green              | green              |
| Petiole length (cm)    | 0.76 ± 0.06 b      | 1.00 ± 0.00 a      | 0.70 ± 0.17 b      | 0.54 ± 0.06 c      | 0.68 ± 0.11 bc     |
| Leaflet length (cm)    | 8.76 ± 1.77 b      | 9.52 ± 2.16 b      | 10.76 ± 3.14<br>b  | 12.68 ± 2.73 ab    | 16.54 ± 3.68 a     |
| Leaflet width (cm)     | 3.28 ± 0.08 c      | 3.38 ± 0.26 c      | 4.46 ± 0.82 b      | 4.54 ± 0.48 b      | 5.44 ± 0.47 a      |
| Leaflet thickness (cm) | 0.26 ± 0.01 b      | 0.25 ± 0.02 b      | 0.26 ± 0.01 b      | 0.28 ± 0.01 a      | 0.28 ± 0.01 a      |
| Stomatal length (mm)   | 21.66 ± 2.12<br>a  | 21.92 ± 1.21<br>a  | 22.52 ± 1.81<br>a  | 22.15 ± 1.59 a     | 21.60 ± 0.50 a     |
| Stomatal width (mm)    | 13.88 ± 0.79<br>a  | 13.68 ± 0.42<br>a  | 12.61 ± 0.39<br>a  | 14.54 ± 1.18 a     | 13.67 ± 0.33 a     |

The data in the table are presented as means ± SD. Different lowercase letters in the same line indicate significant differences between plants at the  $p < 0.05$  level according to Duncan's multiple comparison tests.

**Supplemental Table S3.** Determination of chloroplast number in stomatal guard cells of triploid and diploid leaves.

| Materials         | Number of stomata | Chloroplast number range | Average chloroplast number | Coefficient of variation (%) |
|-------------------|-------------------|--------------------------|----------------------------|------------------------------|
| Diploid (Control) | 50                | 11–23                    | 17.0 b                     | 14.4                         |
| Triploid          | 50                | 15–38                    | 23.7 a                     | 20.1                         |

CV =  $(SD \div M) \times 100\%$ , CV—Coefficient of Variation, SD—Standard Deviation, M—Mean. Different lowercase letters in the same column indicate significant differences between treatments at the  $p < 0.05$  level according to Duncan's multiple comparison tests.
